# Supplementary material
Source: MDPI journal article supplement (https://www.mdpi.com/2311-5637/8/11/577)
Supplement: s1 [file s1]

Table S1. Overview of the metabolites studies in this analysis. The first Q3 for each was used for quantification. The recovery of the extraction step ( $R_E$ ), apparent recovery ( $R_A$ ) and matrix-induced enhancement or suppression (SSE) of the different mycotoxins quantified at a level of 100 ng/g. Limit of Detection (LOD) and Limit of Quantification (LOQ) in ng/g.

| Analyte                 | Retention time (min) | Q1 (m/z) | DP (V) | Q3 (m/z)     | CE (V)  | CXP (V) | $R_E$ (%) | $R_A$ (%) | SSE (%) | LOD   | LOQ   |
|-------------------------|----------------------|----------|--------|--------------|---------|---------|-----------|-----------|---------|-------|-------|
| 3-AcetylDeoxynivalenol  | 3.86                 | 397.3    | -70    | -59.2/-307.1 | -38/-20 | -8/-7   | 107.9     | 14.2      | 13.2    | 3.19  | 10.62 |
| 15-AcetylDeoxynivalenol | 3.84                 | 339.1    | 91     | 137.2/321.2  | 17/13   | 8/18    | 129.3     | 32.4      | 25.1    | 6.54  | 21.80 |
| Deoxynivalenol          | 2.60                 | 355.1    | -70    | -59.2/-265.2 | -40/-22 | -13/-10 | 106.1     | 100.0     | 94.2    | 7.64  | 25.45 |
| Zearalenone             | 7.33                 | 317.1    | -110   | -175/-121.1  | -34/-42 | -13/-8  | 86.6      | 5.2       | 6.0     | 0.53  | 1.76  |
| Nivalenol               | 2.07                 | 371.1    | -75    | -281.1/-59.1 | -22/-42 | -15/-7  | 116.9     | 225.3     | 192.7   | 11.85 | 39.50 |
